# Supplementary material for: Evidence for the natural origins of anomalously high chromium levels in soils of the Cecina Valley (Italy)
Source: Royal Society of Chemistry journal article supplement (doi:10.1039/c8em00063h), 2018-01-01

## Electronic Supplementary Information

### Evidence for the natural origins of anomalously high chromium levels in soils of the Cecina Valley (Italy)

**Eliana Tassi <sup>a\*</sup>, Martina Grifoni <sup>a</sup>, Fabrizio Bardelli <sup>b</sup>, Giuliana Aquilanti <sup>c</sup>, Sonia La Felice <sup>d</sup>, Antonella Iadecola <sup>e</sup>, Pierfranco Lattanzi <sup>f</sup>, Gianniantonio Petruzzelli <sup>a</sup>**

<sup>a</sup> CNR-ISE, Institute of Ecosystem Studies, via G. Moruzzi 1, 56124 Pisa, Italy

<sup>b</sup> CNR-Nanotec at Department of Physics, University La Sapienza, P.le Aldo Moro 2, 00185, Roma, Italy

<sup>c</sup> Elettra-Sincrotrone Trieste, s.s.14 km163.5, 34149 Basovizza (TS), Italy

<sup>d</sup> CNR-IGG, Institute of Geosciences and Earth Resources, via G. Moruzzi 1, 56124 Pisa, Italy

<sup>e</sup> SOLEIL, French National Synchrotron Facility, L'Orme des Merisiers, 91190 Saint-Aubin, France

<sup>f</sup> CNR-IGG, Institute of Geosciences and Earth Resources, Via G. La Pira, 4, 50121 Firenze, Italy

\*corresponding author: [eliana.tassi@ise.cnr.it](mailto:eliana.tassi@ise.cnr.it) (Eliana Tassi)

**Table ESI-1** Georeferenced sampling points and corresponding concentration of Cr, Cu, Ni, Pb, Zn (mg kg<sup>-1</sup>) from Marina di Bibbona-Bolgheri (MBB), Cecina (CC) and Collemezzano (CM) areas. Values in bold exceed the threshold of contaminant concentration for residential soil use established by the Italian legislation (Legislative Decree 152/2006<sup>8</sup>).

| Area/Sample names | longitude | latitude  | Cr        | Cu         | Ni  | Pb          | Zn         |     |
|-------------------|-----------|-----------|-----------|------------|-----|-------------|------------|-----|
| <b>MBB</b>        | 1         | 10.535810 | 43.237084 | <b>193</b> | 40  | <b>206</b>  | 40         | 110 |
|                   | 2         | 10.538535 | 43.240136 | <b>299</b> | 33  | <b>218</b>  | 40         | 87  |
|                   | 3         | 10.540174 | 43.239177 | <b>305</b> | 28  | <b>213</b>  | 45         | 86  |
|                   | 4         | 10.542464 | 43.239146 | <b>291</b> | 37  | <b>208</b>  | 53         | 99  |
|                   | 5         | 10.545954 | 43.240792 | <b>296</b> | 40  | <b>190</b>  | 43         | 81  |
|                   | 6         | 10.544843 | 43.238754 | <b>168</b> | 40  | <b>196</b>  | 55         | 98  |
|                   | 7         | 10.545603 | 43.241067 | <b>203</b> | 37  | <b>210</b>  | 57         | 57  |
|                   | 8         | 10.563105 | 43.236714 | <b>431</b> | 49  | <b>349</b>  | 46         | 81  |
|                   | 9         | 10.562922 | 43.234880 | <b>494</b> | 60  | <b>369</b>  | 47         | 80  |
|                   | 10        | 10.563234 | 43.233597 | <b>381</b> | 55  | <b>306</b>  | 41         | 81  |
|                   | 11        | 10.563754 | 43.231294 | <b>323</b> | 51  | <b>329</b>  | 49         | 83  |
|                   | 12        | 10.570627 | 43.237106 | <b>596</b> | 57  | <b>418</b>  | 48         | 87  |
|                   | 13        | 10.564986 | 43.236607 | <b>420</b> | 66  | <b>341</b>  | 53         | 99  |
|                   | 14        | 10.561545 | 43.236420 | <b>530</b> | 45  | <b>303</b>  | 52         | 88  |
|                   | 1 bis     | 10.542517 | 43.248105 | <b>217</b> | 29  | <b>201</b>  | 46         | 86  |
|                   | 2 bis     | 10.555236 | 43.232409 | <b>261</b> | 44  | <b>372</b>  | 46         | 88  |
|                   | 3 bis     | 10.562696 | 43.209617 | <b>325</b> | 42  | <b>347</b>  | 37         | 70  |
|                   | 4 bis     | 10.564769 | 43.199719 | <b>307</b> | 35  | <b>213</b>  | 44         | 83  |
|                   | 5 bis     | 10.550689 | 43.193896 | <b>218</b> | 49  | <b>159</b>  | 50         | 92  |
|                   | 6 bis     | 10.575203 | 43.194804 | <b>222</b> | 57  | <b>195</b>  | 61         | 95  |
|                   | 7 bis     | 10.590567 | 43.211574 | 151        | 18  | 94          | 43         | 48  |
|                   | 8 bis     | 10.570298 | 43.215158 | <b>174</b> | 63  | <b>213</b>  | 47         | 62  |
|                   | 9 bis     | 10.566279 | 43.217834 | <b>217</b> | 66  | <b>363</b>  | 49         | 69  |
|                   | 10 bis    | 10.571512 | 43.227442 | <b>385</b> | 45  | <b>613</b>  | <b>155</b> | 29  |
|                   | 11 bis    | 10.602841 | 43.232247 | <b>249</b> | 103 | <b>785</b>  | 63         | 57  |
|                   | 12 bis    | 10.579796 | 43.238277 | <b>542</b> | 76  | <b>1190</b> | 66         | 113 |
|                   | 13 bis    | 10.566218 | 43.245766 | <b>298</b> | 48  | <b>328</b>  | 80         | 111 |
|                   | 14 bis    | 10.564370 | 43.250537 | <b>331</b> | 52  | <b>804</b>  | 89         | 137 |
|                   | scas1     | 10.541719 | 43.215943 | <b>289</b> | 17  | <b>324</b>  | 22         | 55  |
|                   | scas2     | 10.552672 | 43.218721 | <b>236</b> | 36  | <b>294</b>  | 24         | 54  |
|                   | scas3     | 10.549944 | 43.223297 | <b>257</b> | 39  | <b>298</b>  | 26         | 63  |
|                   | scas4     | 10.543571 | 43.228875 | 145        | 46  | <b>285</b>  | 31         | 92  |
|                   | scas5     | 10.585397 | 43.232499 | <b>336</b> | 41  | <b>347</b>  | 34         | 63  |
|                   | scas6     | 10.589731 | 43.223471 | <b>272</b> | 27  | <b>169</b>  | 23         | 43  |
|                   | scas7     | 10.559942 | 43.227627 | <b>275</b> | 33  | <b>285</b>  | 33         | 64  |
|                   | scas8     | 10.563087 | 43.230231 | <b>212</b> | 19  | <b>255</b>  | 19         | 37  |
|                   | scas9     | 10.544248 | 43.223986 | <b>207</b> | 47  | <b>300</b>  | 25         | 89  |
|                   | scas10    | 10.526842 | 43.236979 | <b>162</b> | 11  | <b>279</b>  | 25         | 44  |
|                   | scas11    | 10.546426 | 43.237058 | <b>178</b> | 51  | <b>211</b>  | 34         | 87  |
|                   | scas12    | 10.545361 | 43.234407 | 28         | 43  | <b>273</b>  | 48         | 69  |
|                   | scas13    | 10.556374 | 43.248061 | <b>175</b> | 34  | <b>171</b>  | 32         | 74  |

|        |           |           |             |    |             |    |    |
|--------|-----------|-----------|-------------|----|-------------|----|----|
| scas14 | 10.563843 | 43.239108 | <b>253</b>  | 39 | <b>289</b>  | 33 | 63 |
| scas15 | 10.579145 | 43.245039 | <b>182</b>  | 27 | <b>283</b>  | 29 | 49 |
| scas16 | 10.573892 | 43.241474 | <b>247</b>  | 29 | <b>213</b>  | 27 | 46 |
| scas17 | 10.583759 | 43.235800 | <b>305</b>  | 42 | <b>370</b>  | 29 | 60 |
| scas18 | 10.590369 | 43.237581 | <b>311</b>  | 43 | <b>370</b>  | 26 | 59 |
| scas19 | 10.597361 | 43.218592 | <b>340</b>  | 38 | <b>196</b>  | 22 | 53 |
| scas20 | 10.576083 | 43.218482 | <b>247</b>  | 32 | <b>204</b>  | 18 | 49 |
| scas21 | 10.580961 | 43.215723 | <b>225</b>  | 28 | <b>154</b>  | 21 | 46 |
| scas22 | 10.614618 | 43.216549 | 80          | 38 | 77          | 24 | 52 |
| scas23 | 10.617533 | 43.216922 | 104         | 14 | 81          | 20 | 35 |
| scas24 | 10.614211 | 43.202535 | <b>228</b>  | 32 | 69          | 32 | 49 |
| scas25 | 10.662179 | 43.217534 | <b>1070</b> | 23 | <b>1734</b> | 19 | 32 |
| scas26 | 10.581013 | 43.221512 | <b>335</b>  | 33 | <b>175</b>  | 23 | 49 |
| scas27 | 10.569187 | 43.222719 | <b>263</b>  | 45 | <b>321</b>  | 28 | 63 |
| scas28 | 10.562297 | 43.221976 | <b>269</b>  | 32 | <b>263</b>  | 28 | 51 |
| scas29 | 10.552906 | 43.229857 | <b>371</b>  | 44 | <b>345</b>  | 38 | 78 |
| scas30 | 10.569313 | 43.232937 | <b>272</b>  | 48 | <b>323</b>  | 40 | 81 |
| scas31 | 10.569015 | 43.237164 | <b>251</b>  | 48 | <b>265</b>  | 39 | 59 |
| scas32 | 10.568912 | 43.235554 | <b>360</b>  | 48 | <b>389</b>  | 40 | 55 |
| scas33 | 10.564559 | 43.238684 | <b>270</b>  | 47 | <b>338</b>  | 48 | 74 |

**CC**

|        |           |           |            |            |            |    |     |
|--------|-----------|-----------|------------|------------|------------|----|-----|
| 1      | 10.561654 | 43.236338 | <b>255</b> | 48         | <b>515</b> | 55 | 115 |
| 2      | 10.510432 | 43.300029 | <b>189</b> | 35         | <b>232</b> | 58 | 93  |
| 3      | 10.511031 | 43.298859 | <b>211</b> | 46         | <b>329</b> | 65 | 108 |
| 4      | 10.511702 | 43.297049 | <b>200</b> | 41         | <b>256</b> | 67 | 104 |
| 5      | 10.513548 | 43.293964 | <b>230</b> | 40         | <b>227</b> | 65 | 91  |
| 6      | 10.511842 | 43.293752 | 113        | 46         | <b>248</b> | 61 | 103 |
| 7      | 10.510736 | 43.293893 | 92         | 54         | <b>257</b> | 67 | 136 |
| 8      | 10.512301 | 43.295880 | 133        | 62         | <b>281</b> | 81 | 133 |
| 9      | 10.540885 | 43.303044 | 78         | 50         | 72         | 47 | 49  |
| 10     | 10.540869 | 43.302918 | 97         | 24         | <b>146</b> | 43 | 61  |
| 11     | 10.540213 | 43.303296 | 74         | 83         | 70         | 52 | 57  |
| 12     | 10.540016 | 43.303308 | 135        | 32         | <b>125</b> | 49 | 70  |
| 13     | 10.539374 | 43.303281 | 97         | 41         | 62         | 51 | 54  |
| 14     | 10.538515 | 43.303427 | 101        | 83         | 83         | 51 | 58  |
| 15     | 10.539122 | 43.303068 | 105        | 34         | 64         | 56 | 50  |
| 15 bis | 10.502695 | 43.298744 | 135        | 56         | <b>175</b> | 47 | 107 |
| 16 bis | 10.500851 | 43.302955 | <b>152</b> | 56         | <b>229</b> | 50 | 76  |
| 17 bis | 10.511875 | 43.305052 | <b>313</b> | 39         | <b>170</b> | 40 | 67  |
| 18 bis | 10.526944 | 43.300692 | 139        | <b>145</b> | 98         | 32 | 46  |
| 19 bis | 10.527865 | 43.296619 | <b>158</b> | 107        | 67         | 37 | 46  |
| 20 bis | 10.537249 | 43.298690 | 110        | 21         | 53         | 28 | 33  |
| 21 bis | 10.539391 | 43.306891 | <b>150</b> | 117        | 59         | 28 | 51  |
| 22 bis | 10.539045 | 43.309300 | 136        | 49         | 44         | 31 | 42  |
| 23 bis | 10.535885 | 43.305714 | <b>157</b> | <b>131</b> | 66         | 36 | 52  |
| scec1  | 10.541650 | 43.302097 | 96         | 29         | 64         | 39 | 45  |
| scec2  | 10.536427 | 43.301312 | 76         | 22         | 52         | 33 | 37  |
| scec4  | 10.534960 | 43.295920 | 106        | 32         | 78         | 38 | 44  |
| scec5  | 10.530382 | 43.298665 | 87         | 19         | 51         | 37 | 39  |

|        |           |           |            |    |            |            |            |
|--------|-----------|-----------|------------|----|------------|------------|------------|
| scec6  | 10.531679 | 43.302699 | 113        | 50 | 91         | 38         | 41         |
| scec7  | 10.528368 | 43.305877 | 135        | 25 | 93         | 37         | 46         |
| scec8  | 10.523441 | 43.304106 | 94         | 37 | <b>124</b> | 46         | 55         |
| scec9  | 10.510062 | 43.307003 | <b>151</b> | 34 | <b>244</b> | 50         | 65         |
| scec10 | 10.516027 | 43.305897 | 99         | 33 | 89         | 40         | 50         |
| scec11 | 10.508916 | 43.303533 | 149        | 29 | <b>169</b> | 44         | 59         |
| scec12 | 10.512108 | 43.302501 | <b>237</b> | 26 | <b>290</b> | 41         | 62         |
| scec13 | 10.517913 | 43.301920 | 145        | 26 | 77         | 40         | 45         |
| scec14 | 10.516066 | 43.298045 | <b>290</b> | 22 | 117        | 36         | 53         |
| scec15 | 10.520405 | 43.298024 | 129        | 27 | 67         | 36         | 38         |
| scec16 | 10.514792 | 43.294388 | <b>172</b> | 40 | <b>183</b> | 44         | 57         |
| scec17 | 10.506493 | 43.296290 | 92         | 34 | <b>163</b> | 48         | 79         |
| 101zuc | 10.510584 | 43.308653 | 84         | 34 | <b>120</b> | <b>519</b> | 149        |
| 102zuc | 10.509201 | 43.307095 | <b>175</b> | 45 | <b>309</b> | <b>153</b> | <b>161</b> |
| 103zuc | 10.509796 | 43.308379 | 61         | 39 | 75         | 79         | 83         |
| 104zuc | 10.506339 | 43.308051 | 37         | 35 | 54         | 93         | 99         |
| 105zuc | 10.507752 | 43.308816 | 78         | 31 | 93         | 43         | 67         |
| 106zuc | 10.508750 | 43.308290 | 66         | 51 | 106        | <b>203</b> | 73         |

|           |    |           |           |            |            |            |    |            |
|-----------|----|-----------|-----------|------------|------------|------------|----|------------|
| <b>CM</b> | 1  | 10.506260 | 43.335794 | 117        | 92         | <b>170</b> | 45 | 81         |
|           | 2  | 10.509550 | 43.336120 | 140        | 52         | <b>212</b> | 52 | 69         |
|           | 3  | 10.518441 | 43.337002 | <b>180</b> | 58         | <b>243</b> | 57 | 51         |
|           | 4  | 10.522191 | 43.334539 | <b>212</b> | 28         | <b>268</b> | 34 | 46         |
|           | 5  | 10.516206 | 43.341399 | 85         | <b>157</b> | <b>126</b> | 38 | 40         |
|           | 6  | 10.503590 | 43.341547 | 69         | 33         | 66         | 34 | 34         |
|           | 7  | 10.504287 | 43.347787 | 119        | 87         | <b>173</b> | 33 | 46         |
|           | 8  | 10.509005 | 43.347995 | 96         | 46         | 111        | 36 | 52         |
|           | 9  | 10.511157 | 43.348228 | 96         | 21         | <b>144</b> | 33 | 48         |
|           | 10 | 10.512187 | 43.348943 | <b>151</b> | 28         | <b>170</b> | 34 | 50         |
|           | 11 | 10.516509 | 43.349597 | 133        | 22         | <b>246</b> | 33 | 58         |
|           | 12 | 10.516867 | 43.348620 | <b>167</b> | 31         | <b>249</b> | 33 | 70         |
|           | 13 | 10.518102 | 43.349126 | <b>188</b> | 97         | <b>210</b> | 47 | <b>176</b> |
|           | 14 | 10.519589 | 43.349422 | 106        | 21         | <b>125</b> | 37 | 37         |
|           | 15 | 10.508631 | 43.340382 | 131        | 78         | <b>153</b> | 49 | 51         |
|           | 16 | 10.527819 | 43.342019 | <b>234</b> | 24         | <b>306</b> | 35 | 60         |
|           | 17 | 10.523825 | 43.350040 | <b>185</b> | 22         | <b>235</b> | 31 | 61         |
|           | 18 | 10.527982 | 43.355415 | 93         | 119        | <b>214</b> | 27 | 43         |
|           | 19 | 10.530671 | 43.360790 | 57         | 52         | 94         | 41 | 42         |
|           | 20 | 10.527406 | 43.359987 | 67         | 57         | 117        | 34 | 32         |
|           | 21 | 10.516861 | 43.356769 | 71         | 24         | <b>125</b> | 26 | 30         |
|           | 22 | 10.510324 | 43.357405 | 93         | 25         | <b>128</b> | 43 | 33         |
|           | 23 | 10.500870 | 43.350353 | 89         | 30         | <b>152</b> | 28 | 45         |
|           | 24 | 10.483832 | 43.352430 | 98         | 27         | 100        | 39 | 53         |
|           | 25 | 10.478518 | 43.355632 | 82         | 21         | 77         | 25 | 30         |
|           | 26 | 10.484396 | 43.359365 | 88         | 47         | 80         | 30 | 36         |
|           | 27 | 10.492969 | 43.360235 | 116        | 45         | 115        | 31 | 49         |
|           | 28 | 10.500048 | 43.365059 | 78         | 26         | 75         | 30 | 33         |
|           | 29 | 10.509497 | 43.367852 | 83         | 62         | 108        | 35 | 33         |
|           | 30 | 10.497936 | 43.357982 | 92         | 49         | 118        | 28 | 39         |
|           | 31 | 10.494874 | 43.355375 | 88         | 36         | 90         | 30 | 45         |

|                                                  |                                                |           |                                  |            |            |             |             |
|--------------------------------------------------|------------------------------------------------|-----------|----------------------------------|------------|------------|-------------|-------------|
| 32                                               | 10.476523                                      | 43.360890 | 121                              | 23         | 74         | 33          | 38          |
| 33                                               | 10.469711                                      | 43.369594 | <b>154</b>                       | 56         | <b>136</b> | 32          | 44          |
| 34                                               | 10.478855                                      | 43.365470 | <b>174</b>                       | 45         | 99         | 38          | 56          |
| 35                                               | 10.486838                                      | 43.365888 | <b>164</b>                       | 25         | 94         | 33          | 43          |
| 36                                               | 10.496315                                      | 43.368844 | 125                              | 32         | 105        | 35          | 45          |
| 37                                               | 10.484490                                      | 43.375346 | 107                              | 15         | 83         | 37          | 38          |
| 38                                               | 10.485924                                      | 43.372410 | 146                              | 65         | <b>223</b> | 40          | 85          |
| 39                                               | 10.486157                                      | 43.378440 | 124                              | 36         | 84         | 42          | 51          |
| <b>Threshold limits<br/>(mg kg<sup>-1</sup>)</b> | <b>residential, public or<br/>private uses</b> |           | <b>150</b> <small>(tot)</small>  | <b>120</b> | <b>120</b> | <b>100</b>  | <b>150</b>  |
|                                                  |                                                |           | <b>2</b> <small>(Cr VI)</small>  | -          | -          | -           | -           |
|                                                  | <b>industrial or commercial<br/>uses</b>       |           | <b>800</b> <small>(tot)</small>  | <b>600</b> | <b>500</b> | <b>1000</b> | <b>1500</b> |
|                                                  |                                                |           | <b>15</b> <small>(Cr VI)</small> | -          | -          | -           | -           |

**Figure ESI-1** Detailed fitting results (LCF) of XANES spectra from soil samples with model compounds.

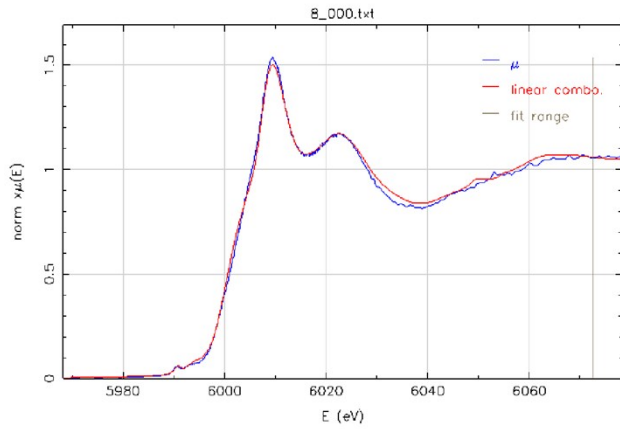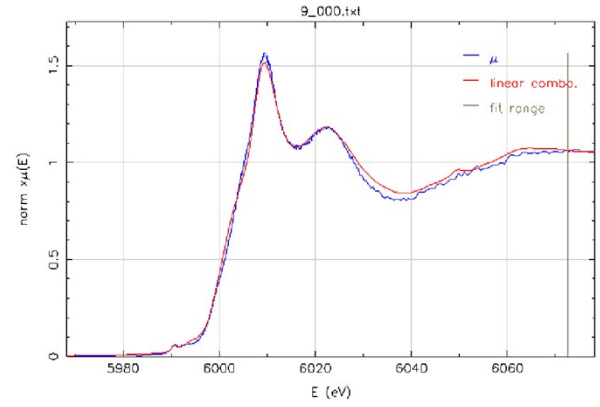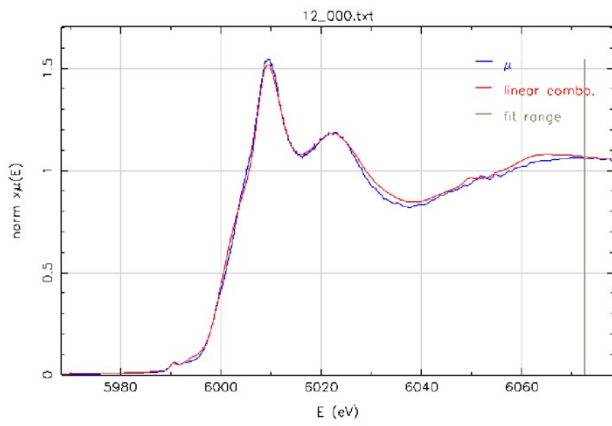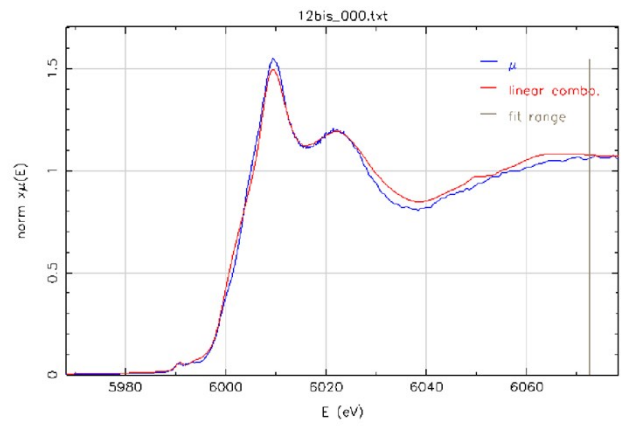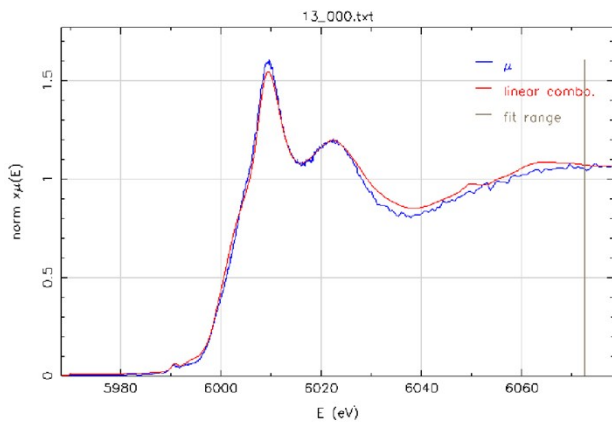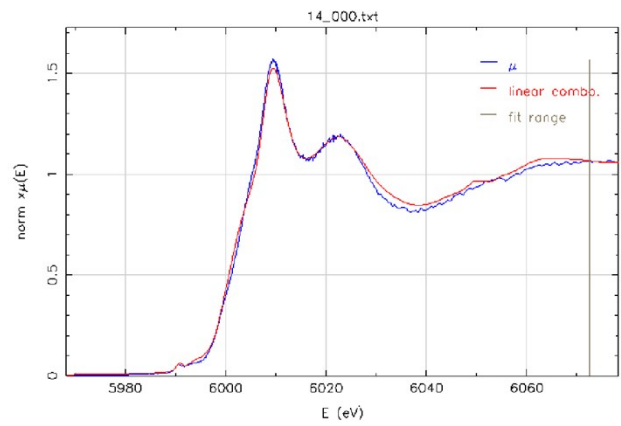

Supplement: c8em00063h1.pdf [file c8em00063h1.pdf]
